# Supplementary material for: HPV-associated head and neck cancer is characterized by distinct profiles of CD8+ T cells and myeloid-derived suppressor cells
Source: Springer Nature journal article supplement (doi:10.1007/s00262-023-03571-8), 2023-11-29
Supplement: MOESM1 [file 26373632]

**Fig. S1**

gated on E7<sub>11-20</sub>-specific CD8<sup>+</sup> cells

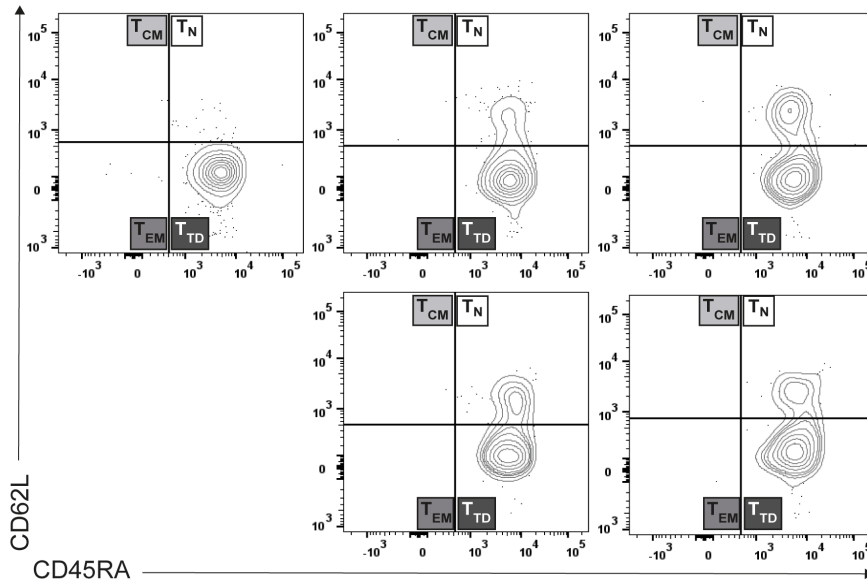

**Supplementary figure S1: T cell phenotype of HPV E7<sub>11-20</sub> specific CD8<sup>+</sup> cells**

CD62L / CD45RA phenotypes of HPV E7<sub>11-20</sub> specific CD8<sup>+</sup> cells in five different patients were stained and identified by flow cytometry

**Fig. S2**

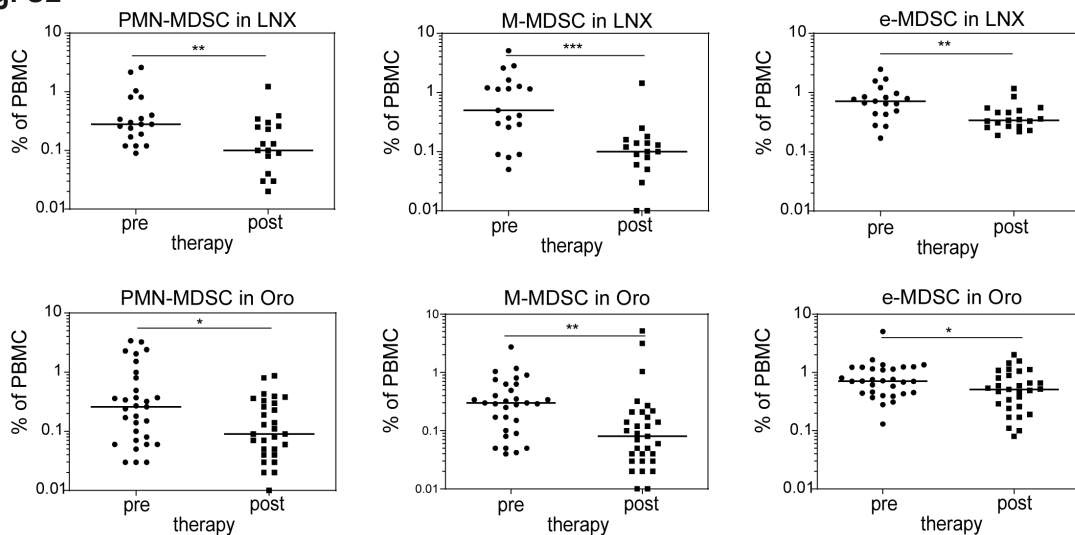

**Supplementary figure S2: post-therapeutic changes in circulating MDSC frequencies according to tumor localization**

The two major tumor localizations, Larynx (LNX, majority of HPV<sup>-</sup> tumors) and Oropharynx (Oro, majority of HPV<sup>+</sup> tumors) were investigated according to post-therapeutic changes in circulating MDSC frequencies. MDSC were identified by flow cytometry and differences between pre- and post-therapeutic frequencies are indicated.
